# Supplementary material for: Gold–mercaptopropionic acid–polyethylenimine composite based DNA sensor for early detection of rheumatic heart disease
Source: Royal Society of Chemistry journal article supplement (doi:10.1039/c4an00324a), 2014-01-01
Supplement: c4an00324a1.pdf [file c4an00324a1.pdf]

| [ssG-DNA]/(ng/6 $\mu$ L) | CV Relative $I_p$ ( $\mu$ A) |
|--------------------------|------------------------------|
| 0                        | 0                            |
| 0.05                     | 0.8                          |
| 0.5                      | 1.44                         |
| 1.0                      | 2.98                         |

LOD =  $3(\sigma/S)$  and  $S = m/A$

$\sigma = 0.466$

$m = 2.986 \mu\text{A}/\text{ng}$

$A = 0.126 \text{ cm}^2$

$S = 23.698 (\mu\text{A}/\text{cm}^2)/\text{ng}$

LOD = 0.05 ng

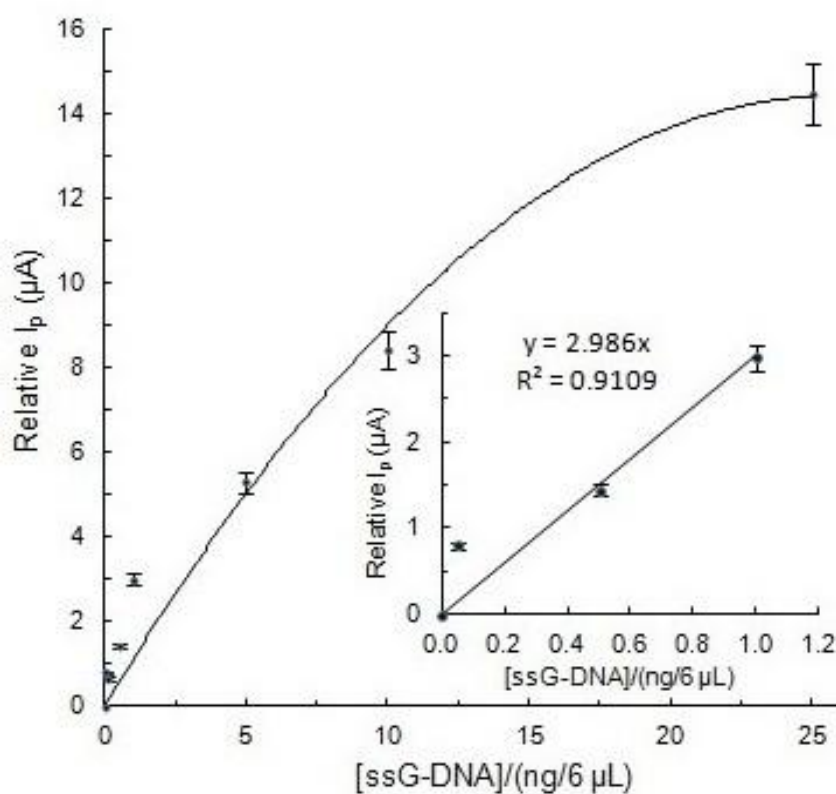

**Fig. S1** The plot between CV relative  $I_p$  with respect to probe and concentrations of hybridizing ssG-DNA (0-25 ng/6  $\mu\text{L}$ ) from Fig. 1 inset. The inset shows 0-1ng/6 $\mu\text{L}$  region of the plot for calculation of the slope, sensitivity and LOD.

| [ssG-DNA]/(ng/6 $\mu$ L) | DPV Relative $I_p$ ( $\mu$ A) |
|--------------------------|-------------------------------|
| 0                        | 0                             |
| 0.05                     | 4.00                          |
| 0.5                      | 7.22                          |
| 1.0                      | 13.65                         |

LOD =  $3(\sigma/S)$  and  $S = m/A$

$\sigma = 0.466$

$m = 13.89 \mu\text{A}/\text{ng}$

$A = 0.126 \text{ cm}^2$

$S = 110.25 (\mu\text{A}/\text{cm}^2)/\text{ng}$

LOD = 0.01 ng

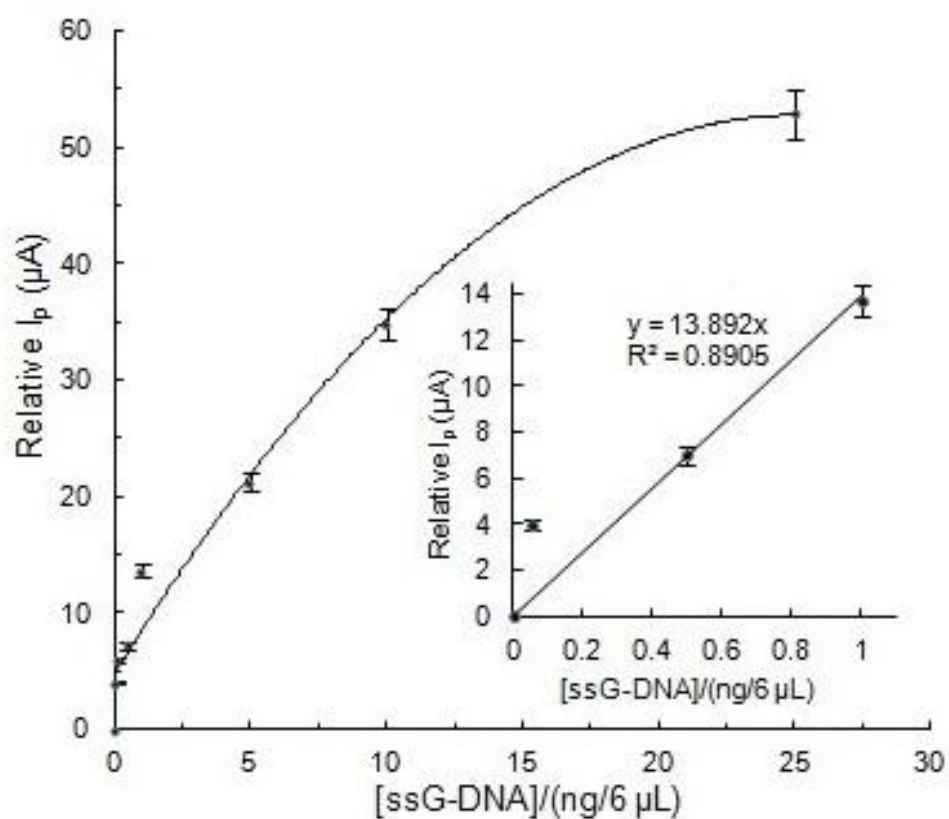

**Fig. S2** The plot between DPV relative  $I_p$  with respect to probe and concentrations of hybridizing ssG-DNA (0-25 ng/6  $\mu$ L) from Fig. 2 inset. The inset shows 0-1ng/6 $\mu$ L region of the plot for calculation of the slope, sensitivity and LOD.
